# Supplementary material for: CdS/Ag2S/g-C3N4 ternary composites with superior photocatalytic performance for hydrogen evolution under visible light irradiation
Source: Royal Society of Chemistry journal article supplement (doi:10.1039/d0dt04292g), 2021-01-01
Supplement: d0dt04292g1.pdf [file d0dt04292g1.pdf]

**CdS/Ag<sub>2</sub>S/g-C<sub>3</sub>N<sub>4</sub> ternary composites with superior photocatalytic performance for hydrogen evolution under visible light irradiation**

Shan Zhao<sup>a</sup>, Junbiao Wu<sup>a</sup>, Yan Xu<sup>a</sup>, Xia Zhang<sup>a</sup>, Yide Han<sup>a\*</sup> and Hongzhu Xing<sup>b\*</sup>

<sup>a</sup> Department of Chemistry, College of Science, Northeastern University, Shenyang, 110819, China

<sup>b</sup> Provincial Key Laboratory of Advanced Energy Materials, College of Chemistry, Northeast Normal University, 5268 Renmin Street, Changchun 130024, China

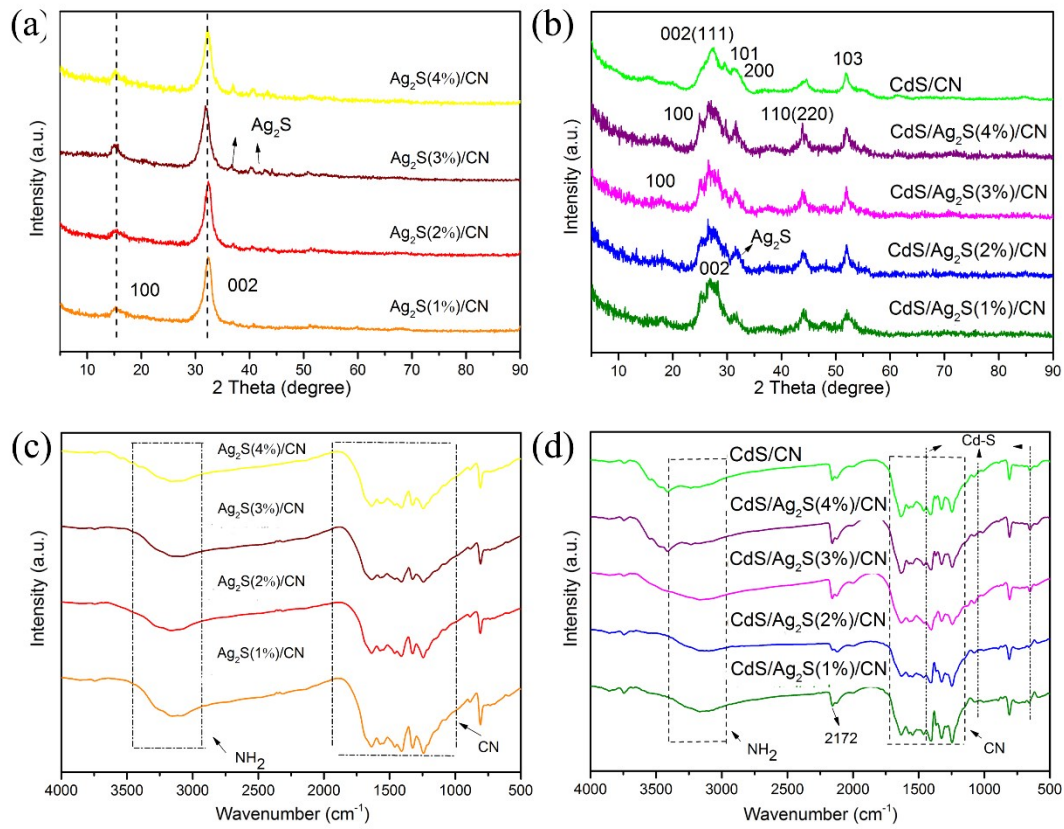

Fig. S1 XRD patterns and FTIR of  $\text{Ag}_2\text{S}/\text{CN}$  and  $\text{CdS}/\text{Ag}_2\text{S}/\text{CN}$  composites

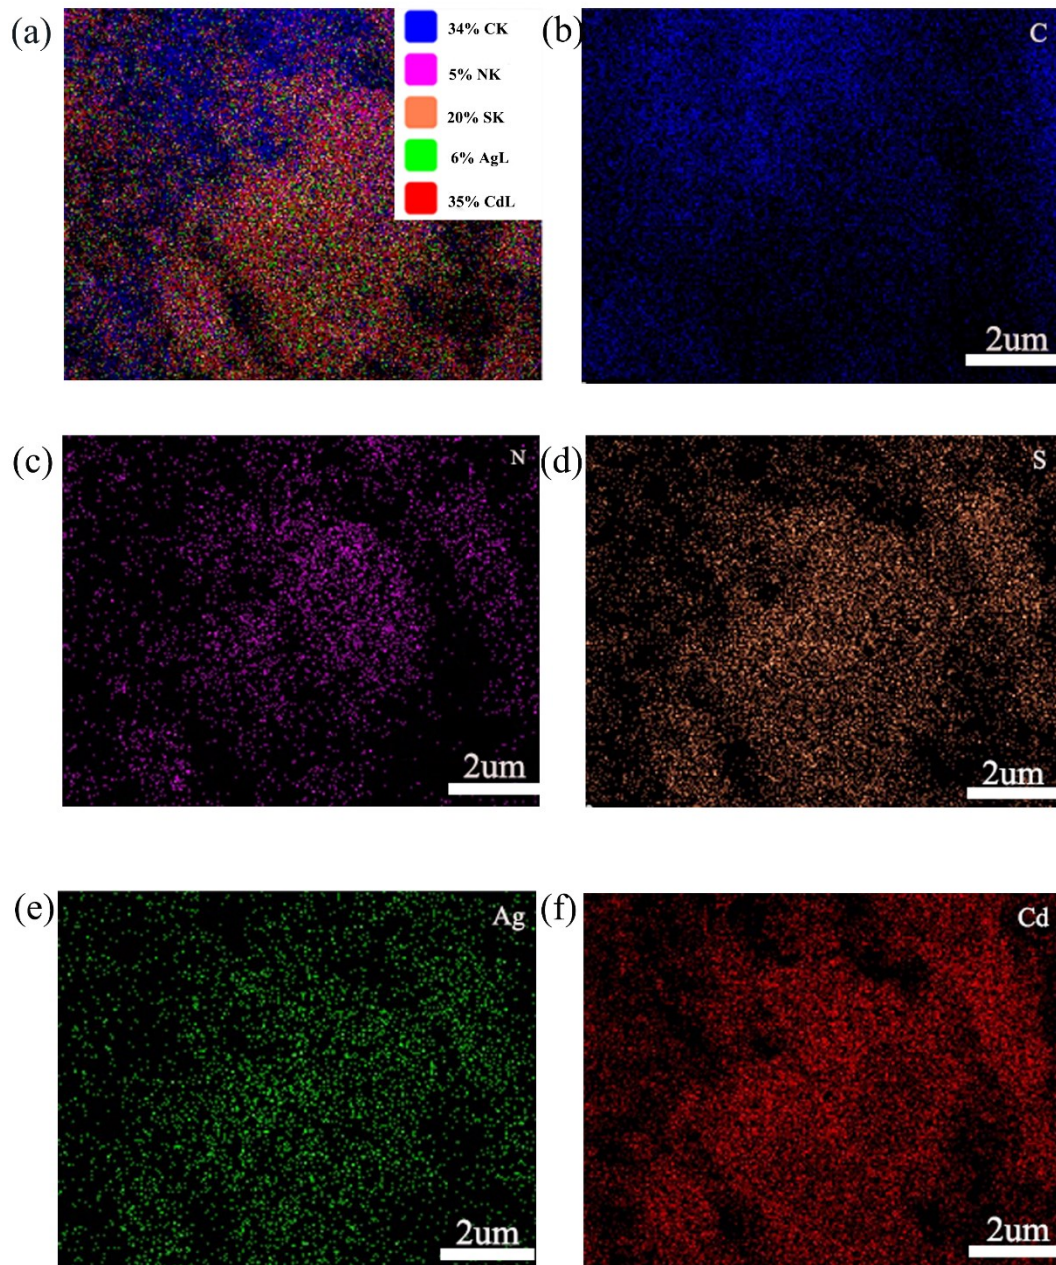

Fig. S2 EDX mapping of CdS/Ag<sub>2</sub>S<sub>2</sub>%/CN composite.

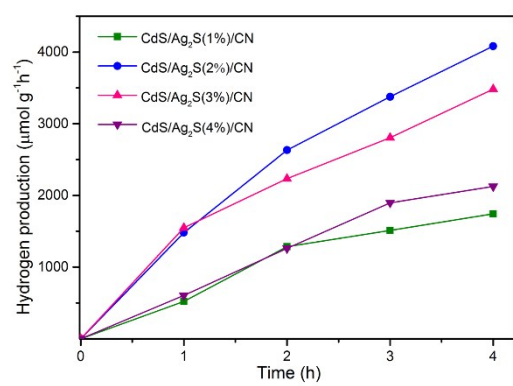

Fig. S3 Photocatalytic hydrogen production activity over CdS/Ag<sub>2</sub>S/CN composites.

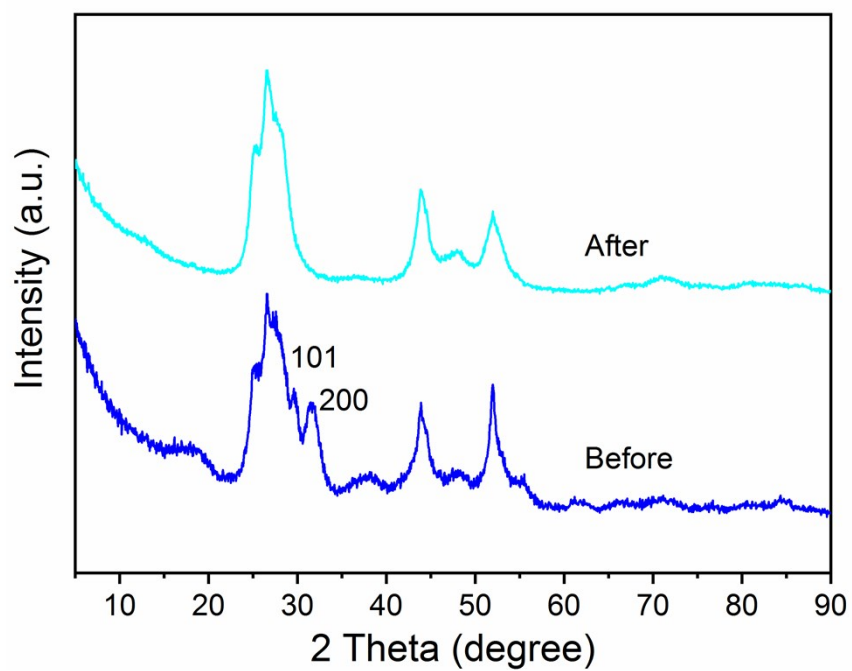

Fig. S4 XRD patterns of CdS/Ag<sub>2</sub>S(2%)/CN ternary composite before and after the stability test.

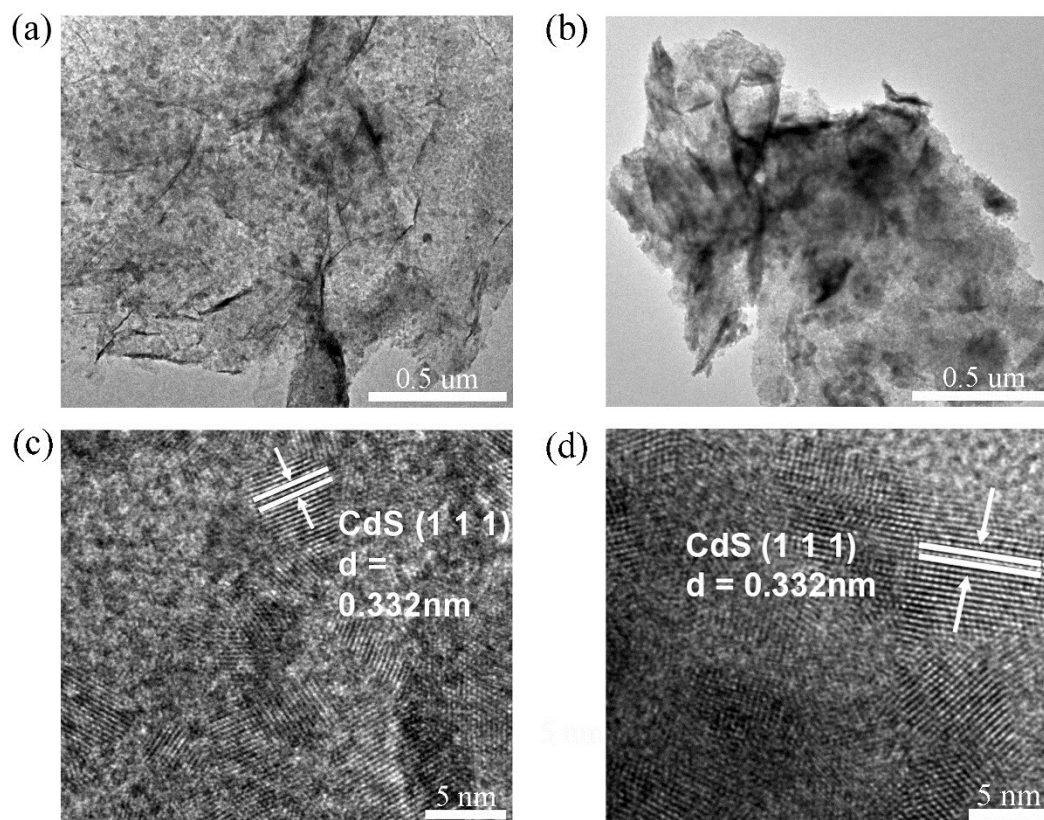

Fig. S5. (a) and (b) TEM images of CdS/Ag<sub>2</sub>S<sub>2</sub>%/CN ternary composite before and after hydrogen evolution reaction, (c) and (d) high-resolution TEM images of ternary composite before and after hydrogen evolution reaction.

Table S1. Comparison of hydrogen production activities of different photocatalysts

| Photocatalyst                                                                           | Co-catalyst                      | Sacrificial agent                                 | Lamp        | Wavelength h (nm)                | H <sub>2</sub> ( $\mu\text{mol h}^{-1} \text{g}^{-1}$ ) | Ref.      |
|-----------------------------------------------------------------------------------------|----------------------------------|---------------------------------------------------|-------------|----------------------------------|---------------------------------------------------------|-----------|
| MoS <sub>2</sub> /Zn <sub>0.5</sub> Cd <sub>0.5</sub> S/g-C <sub>3</sub> N <sub>4</sub> | None                             | Na <sub>2</sub> S-Na <sub>2</sub> SO <sub>3</sub> | 300 W<br>Xe | $\lambda \geq 400 \text{ nm}$    | 4914                                                    | 1         |
| CdS-C <sub>3</sub> N <sub>4</sub> nanosheets                                            | H <sub>2</sub> PtCl <sub>6</sub> | L-ascorbic acid                                   | 300 W<br>Xe | $\lambda > 420 \text{ nm}$       | 4494                                                    | 2         |
| CdS/RGO/g-C <sub>3</sub> N <sub>4</sub>                                                 | None                             | L-ascorbic acid                                   | 300 W<br>Xe | $400 < \lambda < 800 \text{ nm}$ | 676.5                                                   | 3         |
| CdS/Cu <sub>7</sub> S <sub>4</sub> /g-C <sub>3</sub> N <sub>4</sub>                     | None                             | Na <sub>2</sub> S-Na <sub>2</sub> SO <sub>3</sub> | 300 W<br>Xe | $\lambda > 420 \text{ nm}$       | 3570                                                    | 4         |
| CdS/PdAg/g-C <sub>3</sub> N <sub>4</sub>                                                | None                             | Triethanolamine                                   | 300 W<br>Xe | $\lambda \geq 400 \text{ nm}$    | 3098.3                                                  | 5         |
| Cd <sub>0.5</sub> Zn <sub>0.5</sub> S@UIO-66@g-C <sub>3</sub> N <sub>4</sub>            | None                             | Na <sub>2</sub> S-Na <sub>2</sub> SO <sub>3</sub> | 300 W<br>Xe | $\lambda \geq 420 \text{ nm}$    | 1281.1                                                  | 6         |
| CdS/Ag <sub>2</sub> S/g-C <sub>3</sub> N <sub>4</sub>                                   | None                             | Na <sub>2</sub> S-Na <sub>2</sub> SO <sub>3</sub> | 300 W<br>Xe | $\lambda \geq 420 \text{ nm}$    | 1020.54                                                 | This work |

1. Y. Tang, X. Li, D. Zhang, X. Pu, B. Ge and Y. Huang, *Materials Research Bulletin*, 2019, **110**, 214–222.
2. S.-W. Cao, Y.-P. Yuan, J. Fang, M. M. Shahjamali, F. Y. C. Boey, J. Barber, S. C. Joachim Loo and C. Xue, *International Journal of Hydrogen Energy*, 2013, **38**, 1258–1266.
3. W.-K. Jo and N. C. S. Selvam, *Chemical Engineering Journal*, 2017, **317**, 913–924.
4. J. Chu, X. Han, Z. Yu, Y. Du, B. Song and P. Xu, *ACS Applied Materials & Interfaces*, 2018, **10**, 20404–20411.
5. J. Gao, F. Zhang, H. Xue, L. Zhang, Y. Peng, X. Li, Y. Gao, N. Li and G. Lei, *Applied Catalysis B: Environmental*, 2021, **281**, 119509.
6. Q. Liang, J. Jin, C. Liu, S. Xu, C. Yao and Z. Li, *Inorganic Chemistry Frontiers*, 2018, **5**, 335–343.
